# Supplementary material
Source: publisher figshare collection journal article supplement (https://geolsoc.figshare.com/articles/dataset/_/3453659)
Supplement: Supplementary file 1 [file 1]

## Testing the Accuracy of ImageJ

### Testing the accuracy of ImageJ: Method

In order to test the accuracy of the automatic particle counting, manual bulk sediment counts were carried out on 10 images. Of course, the traditional method is not necessarily error free. Thus, a comparison must be made between the accuracy of the new, automated counting method and that of the traditional, manual counting method. To estimate the accuracy of the traditional method, repeat bulk sediment counts were carried out on 10 picking tray squares. Finally, in order to test the *overall* accuracy of this new method, tephra concentration analysis was undertaken on 10 core sections using the traditional method for comparison.

### Testing the accuracy of ImageJ: Results

Analysing the new method presented in this paper was broken down into stages to allow thorough investigation of all potential sources of error. Essentially, if we are investigating the percentage tephra in different sections, there are two sources of error: miscounting of bulk sediment and miscounting/misidentification of tephra.

To quantify the error associated with bulk sediment counting in ImageJ, comparisons were made between manual and automatic counts. Within the context of this investigation, we consider manually counting particles in an image to have perfect accuracy; grains on the image are labelled when counted, and so no particles are missed or counted more than once. Ten images were selected at random and manual counts were carried out (Table S1). We find that the automatic counting method has an associated error of 4.85% (SE=0.88). This represents a 4.85% error in the bulk sediment count, *not* the percentage tephra. If, for example, a tephra concentration was calculated as 20%, a 4.85% error in bulk sediment count represents a range from 19.07% to 21.02%.

**Table S1 - Accuracy of automated counting with ImageJ**

| Core | Section | Image No. | Manual Count | Macro Count | % Error |
|------|---------|-----------|--------------|-------------|---------|
| 0-2  | 0-3mm   | 1         | 293          | 280         | 4.44    |
| 0-2  | 0-3mm   | 5         | 241          | 221         | 8.30    |
| 0-2  | 21-24mm | 1         | 217          | 223         | 2.76    |
| 2-1  | 0-3mm   | 3         | 283          | 262         | 7.42    |
| 2-1  | 3-6mm   | 10        | 475          | 439         | 7.58    |
| 2-2  | 9-12mm  | 8         | 283          | 286         | 1.06    |
| 5-2  | 6-9mm   | 2         | 326          | 315         | 3.37    |
| 5-2  | 12-15mm | 2         | 208          | 225         | 8.17    |

|      |         |   |     |              |              |
|------|---------|---|-----|--------------|--------------|
| 10-1 | 0-3mm   | 4 | 385 | 371          | 3.64         |
| 10-2 | 15-18mm | 4 | 290 | 295          | 1.72         |
|      |         |   |     | <b>Mean:</b> | <b>4.85%</b> |

To compare the accuracy of this new approach to bulk sediment counting with that of the traditional method, repeat counts were carried out on sections of Core 5-1 under an optical microscope. Ten picking tray squares were each counted twice (Table S2). The results suggest a 12.26% (SE=2.55) error associated with bulk sediment counting using the traditional method.

**Table S2 - Accuracy of manual counting under optical microscope**

| Section | Square No. | 1st Count | 2nd Count    | % Error       |
|---------|------------|-----------|--------------|---------------|
| 0-3     | 1          | 182       | 211          | 15.93         |
| 0-3     | 2          | 148       | 187          | 26.35         |
| 0-3     | 3          | 190       | 194          | 2.11          |
| 0-3     | 4          | 256       | 265          | 3.52          |
| 0-3     | 5          | 254       | 268          | 5.51          |
| 0-3     | 6          | 362       | 301          | 16.85         |
| 0-3     | 7          | 227       | 256          | 12.78         |
| 3-6     | 1          | 224       | 205          | 8.48          |
| 3-6     | 2          | 323       | 251          | 22.29         |
| 3-6     | 3          | 274       | 250          | 8.76          |
|         |            |           | <b>Mean:</b> | <b>12.26%</b> |

Our results suggest that, in fact, automatic grain counting in ImageJ (4.85% error) is more accurate than manual grain counting (12.26% error). Of course, the error associated with the traditional bulk sediment counting method is entirely human error and this will vary between operators. Notwithstanding, these results suggest that for particle counting, ImageJ is more accurate than manual counting.

While it is not possible to directly calculate the rate of misidentification of tephra shards in either method, we can compare the final results of each method to give a rough indication of overall accuracy. Calculated tephra percentage for 10 sections, using both methods, is shown in Table S3.

The ImageJ method tends to underestimate the tephra percentage, compared with the manual method. The average error is 23.01% (SE=6.29). It should be noted, however, that larger

errors are more likely when tephra concentration is very low. In these cases, the presence of a single additional tephra grain can significantly affect the apparent concentration. As such, the effect of misidentification is much higher, and there is also a much larger variability between replicates. Furthermore, the stated errors in Table S3 assume that the manual approach to tephra quantification is perfectly accurate. Table S2 demonstrates that this is not the case, and so this may be an under- or an overestimate of the true error.

**Table S3 - Overall comparison between traditional and ImageJ methods**

| Core | Section | % Tephra    |              | % Error       |
|------|---------|-------------|--------------|---------------|
|      |         | Traditional | Macro        |               |
| 0-2  | 0-3mm   | 23.81%      | 19.18%       | 19.47%        |
| 0-2  | 3-6mm   | 0.91%       | 0.27%        | 70.40%        |
| 0-2  | 6-9mm   | 0.05%       | 0.05%        | 7.50%         |
| 2-1  | 0-3mm   | 8.12%       | 7.79%        | 4.08%         |
| 2-4  | 0-3mm   | 14.09%      | 12.47%       | 11.48%        |
| 2-4  | 3-6mm   | 1.33%       | 0.92%        | 31.08%        |
| 5-1  | 0-3mm   | 20.68%      | 14.08%       | 31.91%        |
| 5-1  | 3-6mm   | 4.84%       | 6.24%        | 28.95%        |
| 10-2 | 0-3mm   | 20.67%      | 16.15%       | 21.90%        |
| 10-2 | 3-6mm   | 4.33%       | 4.47%        | 3.34%         |
|      |         |             | <b>Mean:</b> | <b>23.01%</b> |
